1 **Trace metal imaging of sulfate-reducing bacteria and methanogenic archaea**  
2 **at single-cell resolution by synchrotron X-ray fluorescence imaging**

3 *Jennifer B. Glass*<sup>1\*</sup>, *Si Chen*<sup>2</sup>, *Katherine S. Dawson*<sup>3</sup>, *Damian R. Horton*<sup>1</sup>, *Stefan Vogt*<sup>2</sup>, *Ellery D.*  
4 *Ingall*<sup>1</sup>, *Benjamin S. Twining*<sup>4</sup>, *Victoria J. Orphan*<sup>3</sup>

5 <sup>1</sup>School of Earth and Atmospheric Sciences, Georgia Institute of Technology, Atlanta, Georgia  
6 USA;

7 <sup>2</sup>Advanced Photon Source, Argonne National Laboratory, Argonne, Illinois, USA;

8 <sup>3</sup>Division of Geological and Planetary Sciences, California Institute of Technology, Pasadena,  
9 California, USA;

10 <sup>4</sup>Bigelow Laboratory for Ocean Sciences, East Boothbay, Maine, 04544, USA;

11 **Keywords:** sulfate reduction, methanogen, metals, methanol, synchrotron x-ray fluorescence

12 **Running Head:** Single-cell X-ray imaging

13 **\*Corresponding Author:** [Jennifer.Glass@eas.gatech.edu](mailto:Jennifer.Glass@eas.gatech.edu)

14

15 **Abstract**

16 Metal cofactors are required for many enzymes in anaerobic microbial respiration. This study  
17 examined iron, cobalt, nickel, copper, and zinc in cellular and abiotic phases at the single-cell  
18 scale for a sulfate-reducing bacterium (*Desulfococcus multivorans*) and a methanogenic archaeon  
19 (*Methanosarcina acetivorans*) using synchrotron x-ray fluorescence microscopy. Relative  
20 abundances of cellular metals were also measured by inductively coupled plasma mass  
21 spectrometry. For both species, zinc and iron were consistently the most abundant cellular  
22 metals. *M. acetivorans* contained higher nickel and cobalt content than *D. multivorans*, likely  
23 due to elevated metal requirements for methylotrophic methanogenesis. Cocultures contained  
24 spheroid zinc sulfides and cobalt/copper-sulfides.

## 25 **Introduction**

26 In anoxic natural and engineered environments, sulfate-reducing bacteria and methanogenic  
27 archaea perform the last two steps of organic carbon respiration, releasing sulfide and methane.  
28 Sulfate-reducing bacteria and methanogenic archaea can exhibit cooperative or competitive  
29 interactions depending on sulfate and electron donor availability (Brileya et al. 2014; Bryant et  
30 al. 1977; Ozuolmez et al. 2015; Stams and Plugge 2009). Methanol (CH<sub>3</sub>OH), the simplest  
31 alcohol, is an important substrate for industrial applications (Bertau et al. 2014) and microbial  
32 metabolisms. In the presence of methanol, sulfate reduction and methanogenesis occur  
33 simultaneously in cocultures (Dawson et al. 2015; Phelps et al. 1985), anoxic sediments (Finke et  
34 al. 2007; Oremland and Polcin 1982), and anaerobic digesters (Spanjers et al. 2002; Weijma and  
35 Stams 2001). Methanol has also been studied as a substrate for stimulating organochlorine  
36 degradation in sediment reactors containing sulfate-reducing bacteria and methanogenic archaea  
37 (Drzyzga et al. 2002).

38       Metalloenzymes are essential for both sulfate reduction and methylotrophic  
39 methanogenesis (Barton et al. 2007; Ferry 2010; Glass and Orphan 2012; Thauer et al. 2010).  
40 Iron is needed for cytochromes and iron-sulfur proteins in both types of organisms (Fauque and  
41 Barton 2012; Pereira et al. 2011; Thauer et al. 2008). Cobalt and zinc are present in the first  
42 enzymes in sulfate reduction (ATP sulfurylase, Sat; Gavel et al. 1998; Gavel et al. 2008), and  
43 methylotrophic methanogenesis (methanol:coenzyme M methyltransferase; Hagemeyer et al.  
44 2006). Nickel is found in the final enzyme in methanogenesis (methyl coenzyme M reductase;  
45 Ermler et al. 1997), and zinc is present in the heterodisulfide reductase that recycles cofactors  
46 for the methyl coenzyme M reductase enzyme (Hamann et al. 2007). Nickel and cobalt are  
47 required by methanogenic archaea and sulfate-reducing bacteria that are capable of complete

48 organic carbon oxidization for carbon monoxide dehydrogenase/acetyl Co-A synthase in the  
49 Wood-Ljungdahl CO<sub>2</sub> fixation pathway (Berg 2011; Ragsdale and Kumar 1996). Hydrogenases  
50 containing Ni and Fe are functional in many, but not all, sulfate-reducing bacteria (Osburn et al.  
51 2016; Pereira et al. 2011) and methylotrophic methanogens (Guss et al. 2009; Thauer et al.  
52 2010). Evidence for high metabolic metal demands is provided by limited growth of  
53 methanogenic archaea without Co and Ni supplementation in methanol-fed monocultures  
54 (Scherer and Sahm 1981) and anaerobic bioreactors (Florencio et al. 1994; Gonzalez-Gil et al.  
55 1999; Paulo et al. 2004; Zandvoort et al. 2003; Zandvoort et al. 2006).

56 Sulfate-reducing bacteria produce sulfide, which can remove toxic metals from  
57 contaminated ecosystems due to precipitation of metal sulfides with low solubility (Paulo et al.  
58 2015). Metal sulfides may also limit the availability of essential trace metals for microbial  
59 metabolism (Glass and Orphan 2012; Glass et al. 2014). In sulfidic environments such as marine  
60 sediments and anaerobic digesters, dissolved Co and Ni are present in nanomolar concentrations  
61 (Glass et al. 2014; Jansen et al. 2005). These metals are predominantly present as solid metal  
62 sulfide precipitates (Drzyzga et al. 2002; Luther III and Rickard 2005; Moreau et al. 2013)  
63 and/or sorbed to anaerobic sludge (van Hullebusch et al. 2006; van Hullebusch et al. 2005; van  
64 Hullebusch et al. 2004). The bioavailability of metals in these solid phases to anaerobic microbes  
65 remains relatively unknown. Previous studies suggest that methanogenic archaea can leach Ni  
66 from silicate minerals (Hausrath et al. 2007) and metal sulfides (Gonzalez-Gil et al. 1999; Jansen  
67 et al. 2007). Sulfidic/methanogenic bioreactors (Jansen et al. 2005) and *D. multivorans*  
68 monocultures (Bridge et al. 1999) contain high-affinity Co-/Ni- and Cu-/Zn-binding ligands,  
69 respectively, which may aid in liberating metal micronutrients from solid phases when they  
70 become growth-limiting.

71           Due to the importance of trace metals for anaerobic microbial metabolisms in  
72 bioremediation and wastewater treatment, extensive efforts have focused on optimizing metal  
73 concentrations to promote microbial organic degradation in anaerobic digesters (for review, see  
74 Demirel and Scherer (2011)). Numerous studies have investigated the effect of heavy metals on  
75 anaerobic metabolisms at millimolar concentrations in heavy-metal contaminated industrial  
76 wastewaters, whereas few studies have investigated interactions between anaerobic microbes and  
77 transition metals at the low micro- to nanomolar metal concentrations present in most natural  
78 ecosystems and municipal wastewaters (see Paulo et al. 2015 for review). Studies of the metal  
79 content of anaerobic microbes have primarily measured monocultures using non-spatially  
80 resolved techniques such as ICP-MS (Barton et al. 2007; Cvetkovic et al. 2010; Scherer et al.  
81 1983). Little is known about the effect of coculturing on cellular elemental composition and  
82 mineralogy due to changes in geochemistry (e.g. via sulfide production) of the medium and/or  
83 microbial metabolisms (e.g. via competition for growth-limiting substrates).

84           In this study, we measured cellular elemental contents and imaged extracellular metallic  
85 minerals for sulfate-reducing bacteria and methanogenic archaea grown in mono- and co-culture.  
86 For the model sulfate-reducing bacterium, we chose the metabolically versatile species  
87 *Desulfococcus multivorans*, which is capable of complete organic carbon oxidation.  
88 *Methanosarcina acetivorans* C2A, a well-studied strain capable of growing via acetoclastic and  
89 methylotrophic methanogenesis, but not on H<sub>2</sub>/CO<sub>2</sub>, was selected as the model methanogenic  
90 archaeon. These species were chosen because they are the most phylogenetically similar to pure  
91 culture isolates available to syntrophic consortia of anaerobic methanotrophic euryarchaeota  
92 (ANME-2) and sulfate-reducing bacteria (*Desulfosarcina/Desulfococcus*) partner that catalyze  
93 the anaerobic oxidation of methane in marine sediments (see Dawson et al. (2015) for more on

94 coculture design). Individual cells of mono- and cocultures of these two species were imaged for  
95 elemental content on the Bionanoprobe (Chen et al. 2013) at the Advanced Photon Source  
96 (Argonne National Laboratory) and measured for relative abundance of bulk cellular metals by  
97 ICP-MS.

## 98 **Materials and Methods**

### 99 *Culture growth conditions*

100 The growth medium contained (in g L<sup>-1</sup>): NaCl, 23.4; MgSO<sub>4</sub>·7H<sub>2</sub>O, 9.44; NaHCO<sub>3</sub>, 5.0; KCl,  
101 0.8; NH<sub>4</sub>Cl, 1.0; Na<sub>2</sub>HPO<sub>4</sub>, 0.6; CaCl<sub>2</sub>·2H<sub>2</sub>O, 0.14; cysteine-HCl, 0.25; resazurin, 0.001, 3 x 10<sup>-6</sup>  
102 Na<sub>2</sub>SeO<sub>3</sub> supplemented with DSM-141 vitamin (including 1 µg L<sup>-1</sup> vitamin B<sub>12</sub>) and trace  
103 element solutions containing metal concentrations (provided below as measured by ICP-MS) and  
104 1.5 mg L<sup>-1</sup> nitrilotriacetic acid (Atlas 2010). The medium (pH 7.6) was filter sterilized in an  
105 anoxic chamber (97% N<sub>2</sub> and 3% H<sub>2</sub> headspace) and reduced with 1 mM Na<sub>2</sub>S.

106 Monocultures of *Desulfococcus multivorans* (DSM 2059) and *Methanosarcina*  
107 *acetivorans* strain C2A (DSM 2834) were inoculated into 20 mL culture tubes containing 10 mL  
108 of media with N<sub>2</sub>:CO<sub>2</sub> (80:20) headspace, and sealed with butyl rubber stoppers and aluminum  
109 crimp seals. *D. multivorans* monocultures were amended with filter-sterilized lactate (20 mM).  
110 *M. acetivorans* monocultures were amended with filter-sterilized methanol (66 mM). Equal  
111 proportions of dense monocultures in early stationary stage (as assessed by OD<sub>600</sub> measurements;  
112 Fig. S1) were inoculated into sterile media and amended with filter-sterilized lactate (20 mM)  
113 and methanol (66 mM) to form the coculture. Cultures were grown at 30°C without shaking.  
114 After 12 days of growth (Fig. S1), mono- and cocultures were pelleted and frozen for ICP-MS  
115 analysis, or prepared for SXRF imaging.

### 116 *Fluorescence in situ hybridization*

117 In order to confirm that monocultures were free of contamination, and to determine the relative  
118 abundance of *D. multivorans* and *M. acetivorans* in coculture, fluorescence *in situ* hybridization  
119 (FISH) was performed on separate aliquots from the same time point of the cell culture used for  
120 SXRF analyses. One mL of cell culture was preserved in 3% paraformaldehyde for 1-3 hours,  
121 then washed and resuspended in 200  $\mu$ L of 3x PBS:ethanol as described in Dawson et al. (2012).  
122 Four microliters of fixed cells were spotted onto a glass slide and hybridized with an  
123 oligonucleotide probe targeting *Methanosarcina acetivorans* MSMX860 (Raskin et al. 1994) and  
124 the deltaproteobacterial probe Delta495a (Loy et al. 2002) and cDelta495a (Macalady et al.  
125 2006). The FISH hybridization buffer contained 45% formamide, and the hybridization was  
126 carried out at 46°C for 2 hours followed by a 15 minute wash in 48°C washing buffer (Daims et  
127 al. 2005). The slides were rinsed briefly in distilled water, and mounted in a solution of DAPI (5  
128  $\mu$ g/mL) in Citifluor AF-1 (Electron Microscopy Services). Imaging was performed with a 100x  
129 oil immersion objective (Olympus PlanApo). Cell counts were performed by hand. Multiple  
130 fields of view from replicate wells were compiled and counted on the basis of fluorescence in  
131 DAPI (all cells), Cy3 (bacteria), and FITC (archaea).

### 132 ***ICP-MS***

133 Frozen cell pellets were dried (yielding ~4 mg dry weight per sample) in acid-washed Savillex  
134 Teflon vials in a laminar flow hood connected to ductwork for exhausting acid fumes. Cells were  
135 digested overnight at 150°C in 2 mL of trace metal grade nitric acid and 200  $\mu$ L hydrogen  
136 peroxide, dried again, and dissolved in 5 mL 5% nitric acid. The medium was diluted 1:50 in  
137 nitric acid. The elemental content of microbial cells and media was analyzed by ICP-MS  
138 (Element-2, University of Maine Climate Change Institute). Sterile medium contained the

139 following concentrations (in  $\mu\text{M}$ ): P, 800; Zn, 7; Fe, 4; Co, 2; Ni, 0.9; Cu, 0.3. Digestion acid  
140 blanks contained (in nM): P, 127; Zn, 12; Fe, 5; Co, 0.007; Ni, 0.9; Mo, 0.02; Cu, 0.1; V, 0.03.

#### 141 *SXRF sample preparation*

142 Monocultures were prepared for SXRF analysis without chemical fixation by spotting onto  
143 silicon nitride (SiN) wafers (Silson Ltd., cat. 11107126) followed by rinsing with 10 mM HEPES  
144 buffer (pH 7.8). To enable FISH microscopy after SXRF analysis, cocultures were chemically  
145 preserved prior to analysis by incubation on ice for 1 hour in 50 mM HEPES and 0.6 M NaCl  
146 (pH 7.2) containing 3.8% paraformaldehyde and 0.1% glutaraldehyde that had been cleaned of  
147 potential trace-metal contaminants with cation exchange resin (Dowex 50-W X8) using  
148 established protocols (Price et al. 1988; Twining et al. 2003). Cells were then centrifuged, re-  
149 suspended in 10 mM HEPES buffer (pH 7.8) and either embedded in resin and thin sectioned  
150 following the methods described in McGlynn et al. (2015) or spotted directly onto SiN wafers.

#### 151 *SXRF analyses*

152 Whereas ICP-MS measurements cannot delineate the elemental contributions of co-occurring  
153 cell types, SXRF imaging enables elemental quantification of the specific cell of interest (Fahrni  
154 2007; Ingall et al. 2013; Kemner et al. 2004; Nuester et al. 2012; Twining et al. 2003; Twining et  
155 al. 2008). SXRF analyses were performed at the Bionanoprobe (beamline 21-ID-D, Advanced  
156 Photon Source, Argonne National Laboratory). Silicon nitride wafers were mounted  
157 perpendicular to the beam as described in Chen et al. (2013). SXRF mapping was performed  
158 with monochromatic 10 keV hard X-rays focused to a spot size of  $\sim 100$  nm using Fresnel zone  
159 plates. Concentrations and distributions of all elements from P to Zn were analyzed in fine scans  
160 using a step size of 100 nm and a dwell time of 150 ms. An X-ray fluorescence thin film (AXO  
161 DRESDEN, RF8-200-S2453) was measured with the same beamline setup as a reference. MAPS



162 software was used for per-pixel spectrum fitting and elemental content quantification (Vogt  
163 2003). Sample elemental contents were computed by comparing fluorescence measurements  
164 with a calibration curve derived from measurements of a reference thin film.

165 Regions of interest (ROIs) were selected with MAPS software by highlighting each  
166 microbial cell (identified based on elevated P content with care taken to avoid regions of  
167 elevated non-cellular metals) or particle (identified based on elevated metal content). Each ROI  
168 (n=14 and n=17 for *D. multivorans* (radius:  $0.60 \pm 0.01 \mu\text{m}$ ) and *M. acetivorans* (radius:  $0.48 \pm$   
169  $0.01 \mu\text{m}$ ), respectively, and n=13 for the coculture (radius:  $0.96 \pm 0.01 \mu\text{m}$ )) was background  
170 corrected to remove elements originating from each section of the SiN grid on which cells were  
171 spotted. To do so, the mean of triplicate measurements of area-normalized elemental content for  
172 blank areas bordering the analyzed cells was subtracted from cellular ROIs. The background-  
173 corrected area-normalized molar elemental content was then multiplied by cellular ROI area to  
174 obtain molar elemental content per cell, which was then divided by the cell volume ( $4/3\pi r^3$ ,  
175 assuming spherical cells) to yield total metal content per cell volume, in units of  $\text{mmol L}^{-1}$ .  
176 Visualization of elemental co-localization was performed with MAPS software. Statistical  
177 analysis was performed with JMP Pro (v. 12.1.0) using the Tukey-Kramer HSD test.

178

## 179 **Results**

### 180 ***Cellular elemental content of monocultures***

181 Cellular metal contents of *M. acetivorans* and *D. multivorans* monocultures followed the trend  
182  $\text{Zn} \approx \text{Fe} > \text{Cu} > \text{Co} > \text{Ni}$  when measured by SXRF, and  $\text{Zn} \approx \text{Fe} > \text{Co} > \text{Ni} > \text{Cu}$  when measured  
183 by ICP-MS (Fig. 1). When normalized to cell volume, cellular S measured by SXRF was 50x  
184 higher in methanol-grown *M. acetivorans* (n=14) than lactate-grown *D. multivorans* (n=17).

185 Cellular P, Fe, Co, Ni and Cu were 4-7x higher in *M. acetivorans* than *D. multivorans*, and  
186 cellular Zn was not significantly different between the two microbes (Table 1).

### 187 ***Relative abundance of species in coculture***

188 Coculturing of both species for 12 days in media containing methanol and lactate resulted in  
189 dominance of *M. acetivorans* (77%, or 1,753 cells hybridized with the MSMX860 FISH probe)  
190 over *D. multivorans* (23%, or 522 cells hybridized with the Delta495a FISH probe) for 2,275  
191 total cells counted in ten 100x (125 x 125  $\mu\text{m}$ ) fields of view. Cells were  $\sim 1 \mu\text{m}^2$  cocci. No other  
192 cells exhibited DAPI staining other than those that hybridized with MSMX860 and Delta495a  
193 oligonucleotide probes. Attempts at FISH microscopy after SXRF analysis were unsuccessful  
194 due to x-ray radiation damage of the cells.

### 195 ***Cellular elemental content of cocultures***

196 ICP-MS measurements showed that the relative abundance of cellular metals remained relatively  
197 constant between mono- and cocultures, whereas SXRF data indicated that the coculture  
198 contained a relatively higher proportion of Co than the monocultures (Fig. 1). SXRF imaging  
199 showed no visual difference in elemental distribution between cells in the coculture (Fig. 2),  
200 although the relatively small size of the cells relative to the focused x-ray spot may have limited  
201 our ability to discern subtle differences. Cocultures, which were fixed with paraformaldehyde  
202 and glutaraldehyde for subsequent fluorescence microscopy, were larger (radius:  $0.96 \pm 0.01$   
203  $\mu\text{m}$ ) than monocultures (*D. multivorans* radius:  $0.60 \pm 0.01 \mu\text{m}$ ; *M. acetivorans* radius:  $0.48 \pm$   
204  $0.01 \mu\text{m}$ ), which were not fixed prior to analysis. When normalized on a per cell basis,  
205 cocultures contained 5-20x higher P, Co and Ni than monocultures; however, when normalized  
206 to cellular volume, the larger cell volumes of the cocultures resulted in significantly less Fe, Cu  
207 and Zn per cellular volume than either of the monocultures (Table 1).

## 208 *Non-cellular metals in cocultures*

209 In whole cell SXRF images, ~30 “hot spots” (discrete semi-circular areas with low-P and  
210 elevated metals, indicative of nano-sized minerals) of Zn (max:  $0.7 \mu\text{g cm}^{-2}$ ), Co (max:  $0.4 \mu\text{g}$   
211  $\text{cm}^{-2}$ ) and S (max:  $2.7 \mu\text{g cm}^{-2}$ ) were present in the center of a cluster of ~30 cocultured cells  
212 identified as P-containing cocci (Fig. 2). In thin sections, semi-circular non-cellular small Zn hot  
213 spots ( $0.6 \pm 0.1 \mu\text{m}^2$ ) containing ~1:1 molar ratios of Zn:S ( $17 \pm 2 \mu\text{g Zn cm}^{-2}$ :  $7.6 \pm 0.7 \mu\text{g S}$   
214  $\text{cm}^{-2}$ ) were interspersed amongst cell clusters (n=8; Fig. 3a-e) along with more numerous  
215 spheroid non-cellular Co hot spots of the same size ( $0.6 \pm 0.1 \mu\text{m}^2$ ) containing  $2.1 \pm 0.1 \mu\text{g Co}$   
216  $\text{cm}^{-2}$ ,  $3.4 \pm 0.2 \mu\text{g S cm}^{-2}$ , and  $1.3 \pm 0.1 \mu\text{g Cu cm}^{-2}$  (n=45; Fig. 3a-e). Discrete semi-circular hot  
217 spots of elevated Ni (max:  $2.9 \mu\text{g cm}^{-2}$ ) with low S were observed in two imaging fields (n=8;  
218 Fig. 3b,c).

219

## 220 **Discussion**

221 In this study, SXRF imaging and quantification of trace metals in cellular and abiotic phases was  
222 performed at the single-cell scale. Our observation that Zn and Fe were the two most abundant  
223 cellular trace metals in monocultures is consistent with previous studies of diverse prokaryotes  
224 (Barton et al. 2007; Cvetkovic et al. 2010; Outten and O'Halloran 2001; Rouf 1964), including  
225 diverse mesophilic and hyperthermophilic methanogens grown on a range of substrates, for  
226 which, generally: Fe > Zn > Ni > Co > Cu (Cameron et al. 2012; Scherer et al. 1983). To our  
227 knowledge, there are no previous reports of the trace metal content of sulfate-reducing bacteria,  
228 but the abundance of Fe and Zn-containing proteins encoded by their genomes (Barton and  
229 Fauque 2009; Barton et al. 2007; Fauque and Barton 2012) is consistent with the cellular  
230 enrichment we observed in these trace metals.

231 Both normalizations for SXRF data (per cell and per cellular volume) showed that the  
232 methanogenic archaeon contained more P, S, Co, Ni and Cu than the sulfate-reducing bacterium.  
233 The higher cellular Co content of *M. acetivorans* vs. *D. multivorans* is likely due to due to  
234 numerous methyltransferases involved in methylotrophic methanogenesis (Zhang and Gladyshev  
235 2010; Zhang et al. 2009) that contain cobalt as a metal center in their corrinoid (vitamin B<sub>12</sub>)  
236 cofactor, in addition to the corrinoid-containing Fe-S methyltransferase protein in the Wood  
237 Ljungdahl pathway in both species (Ekstrom and Morel 2008; Fig. 4). Similarly, the higher Ni  
238 content of *M. acetivorans* vs. *D. multivorans* is likely due to the presence of Ni-containing  
239 cofactor F<sub>430</sub> in methyl coenzyme M reductase, the final enzyme in the methanogenesis pathway.  
240 Cofactor F<sub>430</sub> is found only in methane-metabolizing archaea, in which it comprises 50-80% of  
241 total cellular Ni (Diekert et al. 1981; Mayr et al. 2008). Additional Ni requirements in both *M.*  
242 *acetivorans* and *D. multivorans* are used for Ni-Fe hydrogenases and carbon monoxide  
243 dehydrogenase in the Wood-Ljungdahl pathway (Fig. 4).

244 Metabolic Cu requirements for methanogenesis are not well known, although high  
245 accumulations have also been reported for other methanogens (Scherer et al. 1983). However, it  
246 should be noted that our early trials analyzing S-rich cells on Au grids revealed artifacts resulting  
247 from interactions of S and Cu underlying the grid's surface Au coating (data not shown); use of  
248 SiN grids in this study appeared to eliminate such Cu artifacts, but potential reactions between  
249 trace Cu in SiN grids and abundant S in the archaeal cells cannot be completely discounted.

250 Faster growth rates of methylotrophic methanogens than sulfate-reducing bacteria at  
251 moderate temperatures have been reported in previous studies (Dawson et al. 2015; Weijma and  
252 Stams 2001), and likely account for *M. acetivorans* outcompeting *D. multivorans* in our  
253 cocultures. We consider it unlikely that differences in cellular trace metal contents in

254 monocultures were a result of harvesting *D. multivorans* earlier in their stationary phase than *M.*  
255 *acetivorans* (Fig. S1) because cellular metal reserves generally decline or remain constant in  
256 stationary phase (Bellenger et al. 2011). Our SXRF measurements of cocultures are more  
257 difficult to interpret due to apparent swelling of aldehyde-fixed cocultured cells (~1  $\mu\text{m}$  radius)  
258 to ~2x the size of monocultures (0.5-0.6  $\mu\text{m}$  radius). When normalized per cell, fixed cocultures  
259 showed significantly higher P, Co and Ni than unfixed monocultures, but the apparent swelling  
260 of cocultured cells erased this trend when normalized to cellular volume.

261         When grown at millimolar metal concentrations, sulfate-reducing bacteria efficiently  
262 remove metals from solution (Krumholz et al. 2003) and precipitate covellite (CuS; Gramp et al.  
263 2006; Karnachuk et al. 2008), sphalerite/wurtzite (ZnS/(Zn,Fe)S; Gramp et al. 2007; Xu et al.  
264 2016), and pentlandite (Co<sub>9</sub>S<sub>8</sub>) (Sitte et al. 2013). Based on its ~1:1 Zn:S ratio, the semi-circular  
265 nanoparticulate zinc sulfide phase(s) observed in thin sections imaged by SXRF in this study  
266 were likely sphalerite spheroids, also found in sulfate-reducing bacteria biofilms due to  
267 aggregation of ZnS nanocrystals (0.1-10  $\mu\text{m}$ ) and extracellular proteins (Moreau et al. 2004;  
268 Moreau et al. 2007). The abiotic phase with the approximate stoichiometry (CoCu)<sub>2</sub>S<sub>2</sub> may be  
269 mineralogically distinct from those in previous studies.

270

## 271 **Conclusions and Challenges**

272 This study used two independent methods for assessing trace metal inventories in anaerobic  
273 microbial cultures. We found that SXRF is a promising method for imaging and quantifying  
274 first-row transition metals in anaerobic microbial cultures at single-cell resolution. This method's  
275 single-cell resolution enables more precise measurements of cellular metal content than ICP-MS  
276 analysis of bulk cells, which can include metals bound to extracellular aggregations such as

277 cation-binding exopolymeric substances produced by sulfate-reducing bacteria (Beech and  
278 Cheung 1995; Beech et al. 1999; Braissant et al. 2007). We did not observe evidence of metal  
279 contamination from aldehyde fixation in SXRF data, likely because we pre-cleaned fixatives  
280 with metal-chelating resin prior to use, as previously described by Twining et al. (2003).

281 Challenges remain with accurate elemental quantification of microbial cocultures  
282 preserved in a manner that would also allow assignment of identity for similar cell types. It was  
283 not possible to distinguish methanogenic archaea from sulfate-reducing bacteria in coculture on  
284 the basis of cell morphology or elemental content, and attempts to image cells with fluorescent  
285 oligonucleotide probes after SXRF analysis were unsuccessful due to x-ray radiation damage.  
286 We recommend method development for simultaneous taxonomic identification and elemental  
287 imaging (e.g. gold-FISH (Schmidt et al. 2012)) for samples containing multiple microbial  
288 species as a high priority for future work.

289 **Author Contributions**

290 J.B.G., V.J.O., S.C., and K.S.D. conceived and designed the experiments; K.S.D. performed the  
291 microbial culturing, S.C., J.B.G., and S.V. performed the SXRF analyses; B.S.T. performed the  
292 ICP-MS analysis, J.B.G., S.C., D.R.H., S.V., E.D.I., and B.S.T. analyzed the data; and J.B.G.  
293 wrote the manuscript with input from all authors. All authors have given approval to the final  
294 version of the manuscript.

295 **Funding Sources**

296 This work was supported by a NASA Astrobiology Postdoctoral Fellowship to J.B.G, NASA  
297 Exobiology award NNX14AJ87G to J.B.G., DOE Biological and Environmental Research award  
298 DE-SC0004949 to V.J.O, and NSF award OCE-0939564 to V.J.O. Use of the Advanced Photon  
299 Source, an Office of Science User Facility operated for the U.S. DOE Office of Science by  
300 Argonne National Laboratory, was supported by the U.S. DOE under Contract No. DE-AC02-  
301 06CH11357. Use of the LS-CAT Sector 21 was supported by the Michigan Economic  
302 Development Corporation and the Michigan Technology Tri-Corridor (Grant 085P1000817). We  
303 thank two anonymous reviewers for helpful feedback on the previous version of this manuscript.

304 **Acknowledgements**

305 We thank Shawn McGlynn for assistance with sample preparation, and Keith Brister, Junjing  
306 Deng, Barry Lai and Rachel Mak at LS-CAT for assistance with Bionanoprobe analysis. We  
307 thank Larry Barton and Joel Kostka for helpful discussions, and Marcus Bray, Amanda Cavazos,  
308 Grayson Chadwick, Chloe Stanton, and Nadia Szeinbaum for feedback on previous manuscript  
309 drafts.

310

311 **Table 1.** Mean and standard error (in parentheses) of elemental contents normalized per cellular  
 312 volume and per cell as measured by SXRF. Monocultures were prepared without chemical  
 313 fixation, and cocultures were prepared with paraformaldehyde and glutaraldehyde fixation,  
 314 followed by spotting onto silicon nitride wafers as described in the text. A, B and C superscripts  
 315 indicate statistically different elemental contents ( $p < 0.05$  based on Tukey-Kramer HSD test).

| Culture                                                                                                | Substrate (mM)                    | P                                                              | S                          | Fe                        | Co                        | Ni                          | Cu                          | Zn                        |
|--------------------------------------------------------------------------------------------------------|-----------------------------------|----------------------------------------------------------------|----------------------------|---------------------------|---------------------------|-----------------------------|-----------------------------|---------------------------|
|                                                                                                        |                                   | Element per cellular volume (mmol L <sup>-1</sup> )            |                            |                           |                           |                             |                             |                           |
| 100% <i>Methanosarcina acetivorans</i> DSM 2834 (n = 14)                                               | Methanol (66 mM)                  | 382 <sup>A</sup><br>(47)                                       | 4553 <sup>A</sup><br>(458) | 38 <sup>A</sup><br>(4)    | 3.1 <sup>A</sup><br>(0.3) | 0.44 <sup>A</sup><br>(0.04) | 11 <sup>A</sup><br>(1)      | 38 <sup>A</sup><br>(3)    |
| 100% <i>Desulfococcus multivorans</i> DSM 2059 (n = 17)                                                | Lactate (20 mM)                   | 55 <sup>B</sup><br>(7)                                         | 96 <sup>B</sup><br>(11)    | 22 <sup>B</sup><br>(4)    | 0.5 <sup>B</sup><br>(0.1) | 0.11 <sup>B</sup><br>(0.02) | 3 <sup>B</sup><br>(1)       | 36 <sup>A</sup><br>(10)   |
| 77% <i>Methanosarcina acetivorans</i> DSM 2834, 23% <i>Desulfococcus multivorans</i> DSM 2059 (n = 13) | Methanol (66 mM), lactate (20 mM) | 353 <sup>A</sup><br>(32)                                       | 234 <sup>B</sup><br>(19)   | 3.6 <sup>C</sup><br>(0.3) | 2.0 <sup>C</sup><br>(0.2) | 0.15 <sup>B</sup><br>(0.01) | 0.13 <sup>C</sup><br>(0.04) | 2.4 <sup>B</sup><br>(0.2) |
|                                                                                                        |                                   | Element per cell (mol x 10 <sup>-18</sup> cell <sup>-1</sup> ) |                            |                           |                           |                             |                             |                           |
| 100% <i>Methanosarcina acetivorans</i> DSM 2834 (n = 14)                                               | Methanol (66 mM)                  | 178 <sup>A</sup><br>(28)                                       | 2167 <sup>A</sup><br>(318) | 19 <sup>A</sup><br>(4)    | 1.5 <sup>A</sup><br>(0.2) | 0.20 <sup>A</sup><br>(0.03) | 5 <sup>A</sup><br>(1)       | 17 <sup>AB</sup><br>(2)   |
| 100% <i>Desulfococcus multivorans</i> DSM 2059 (n = 17)                                                | Lactate (20 mM)                   | 60 <sup>A</sup><br>(11)                                        | 107 <sup>B</sup><br>(19)   | 24 <sup>A</sup><br>(6)    | 0.5 <sup>A</sup><br>(0.1) | 0.12 <sup>A</sup><br>(0.02) | 3 <sup>A</sup><br>(1)       | 39 <sup>A</sup><br>(12)   |
| 77% <i>Methanosarcina acetivorans</i> DSM 2834, 23% <i>Desulfococcus multivorans</i> DSM 2059 (n = 13) | Methanol (66 mM), lactate (20 mM) | 1252 <sup>B</sup><br>(69)                                      | 855 <sup>C</sup><br>(69)   | 13 <sup>A</sup><br>(1)    | 7 <sup>B</sup><br>(1)     | 2 <sup>B</sup><br>(1)       | 0.5 <sup>B</sup><br>(0.2)   | 9 <sup>B</sup><br>(1)     |

316



317 **Figure Captions**

318 **Figure 1.** Proportions of each cellular metal (Fe, Co, Ni, Cu and Zn) for monocultures of  
319 *Methanosarcina acetivorans* (n=14), monocultures of *Desulfococcus multivorans* (n=18), and  
320 cocultures of 77% *M. acetivorans* and 23% *D. multivorans* (n=12) measured by ICP-MS (bulk  
321 measurement) and SXRF (single cell average).

322 **Figure 2.** SXRF co-localization of P (red), Co (green), and Zn (blue; left panel), and S (red), Ni  
323 (green), and Cu (blue; right panel) for whole cells of 77% *Methanosarcina acetivorans* and 23%  
324 *Desulfococcus multivorans* in coculture. Values in parentheses are maxima in  $\mu\text{g cm}^{-2}$  for each  
325 element.

326 **Figure 3.** SXRF co-localization of P (red), Co (green), and Zn (blue) in left panels, and S (red),  
327 Ni (green), and Cu (blue) in right panels for five imaged fields of 5  $\mu\text{m}$  thin sections of 77%  
328 *Methanosarcina acetivorans* and 23% *Desulfococcus multivorans* cocultures. Values in  
329 parentheses are maxima in  $\mu\text{g cm}^{-2}$  for each element.

330 **Figure 4.** Schematic of metalloenzyme-containing metabolic pathways in the complete carbon-  
331 oxidizing sulfate-reducing bacterium *Desulfococcus multivorans* and the methylotrophic  
332 methanogenic archaeon *Methanosarcina acetivorans* as confirmed by genomic analyses. Nickel  
333 (Acs, Cdh, Mcr) and cobalt (CFeSP, Mts, Mtr, and Sat) containing enzymes are labeled in bold.  
334 Enzyme abbreviations: Acs/CFeSP: acetyl-CoA synthase/corrinoid-FeS protein; Cdh: carbon  
335 monoxide dehydrogenase; Mts: methanol:coenzyme M methyltransferase; Mcr: methyl  
336 coenzyme M reductase; Mtr: methyl-tetrahydromethanopterin:coenzyme M methyltransferase;  
337 Sat: ATP sulfurylase.

338 **Figure S1.** Growth curves based on OD600 for the three cultures described in this study:  
339 *Methanosarcina acetivorans* (white), *Desulfococcus multivorans* (light grey), and 77%  
340 *Methanosarcina acetivorans* and 23% *Desulfococcus multivorans* cocultures (dark grey).  
341

## 342 **References**

- 343 Atlas RM. 2010. Handbook of Microbiological Media. CRC press.
- 344 Barton LL, Fauque GD. 2009. Biochemistry, physiology and biotechnology of sulfate-reducing  
345 bacteria. *Adv Appl Microbiol* 68:41-98.
- 346 Barton LL, Goulhen F, Bruschi M, Woodards NA, Plunkett RM, Rietmeijer FJM. 2007. The  
347 bacterial metallome: composition and stability with specific reference to the anaerobic  
348 bacterium *Desulfovibrio desulfuricans*. *Biometals* 20:291–302.
- 349 Beech I, Cheung CS. 1995. Interactions of exopolymers produced by sulphate-reducing bacteria  
350 with metal ions. *Int Biodeter Biodegr* 35(1):59-72.
- 351 Beech I, Zinkevich V, Tapper R, Gubner R, Avci R. 1999. Study of the interaction of sulphate-  
352 reducing bacteria exopolymers with iron using X-ray photoelectron spectroscopy and  
353 time-of-flight secondary ionisation mass spectrometry. *J Microbiol Met* 36(1):3-10.
- 354 Bellenger JP, Wichard T, Xu Y, Kraepiel AML. 2011. Essential metals for nitrogen fixation in a  
355 free living N<sub>2</sub> fixing bacterium: chelation, homeostasis and high use efficiency. *Environ*  
356 *Microbiol* 13(6):1395–1411.
- 357 Berg IA. 2011. Ecological aspects of the distribution of different autotrophic CO<sub>2</sub> fixation  
358 pathways. *Appl Environ Microbiol* 77(6):1925-1936.
- 359 Bertau M, Offermanns H, Plass L, Schmidt F, Wernicke H-J. 2014. Methanol: the basic chemical  
360 and energy feedstock of the future. Springer.
- 361 Braissant O, Decho AW, Dupraz C, Glunk C, Przekop KM, Visscher PT. 2007. Exopolymeric  
362 substances of sulfate-reducing bacteria: interactions with calcium at alkaline pH and  
363 implication for formation of carbonate minerals. *Geobiology* 5(4):401-411.
- 364 Bridge TA, White C, Gadd GM. 1999. Extracellular metal-binding activity of the sulphate-  
365 reducing bacterium *Desulfococcus multivorans*. *Microbiology* 145(10):2987-2995.
- 366 Brileya KA, Camilleri LB, Zane GM, Wall JD, Fields MW. 2014. Biofilm growth mode  
367 promotes maximum carrying capacity and community stability during product inhibition  
368 syntrophy. *Front Microbiol* 5:693.
- 369 Bryant M, Campbell LL, Reddy C, Crabill M. 1977. Growth of *Desulfovibrio* in lactate or  
370 ethanol media low in sulfate in association with H<sub>2</sub>-utilizing methanogenic bacteria. *Appl*  
371 *Environ Microbiol* 33(5):1162-1169.
- 372 Cameron V, House CH, Brantley SL. 2012. A first analysis of metallome biosignatures of  
373 hyperthermophilic archaea. *Archaea* 2012:12.
- 374 Chen S, Deng J, Yuan Y, Flachenecker C, Mak R, Hornberger B, Jin Q, Shu D, Lai B, Maser J,  
375 Roehrig C, Paunesku T, Gleber SC, Vine DJ, Finney L, VonOsinski J, Bolbat M, Spink I,  
376 Chen Z, Steele J, Trapp D, Irwin J, Feser M, Snyder E, Brister K, Jacobsen C, Woloschak  
377 G, Vogt S. 2013. The Bionanoprobe: hard X-ray fluorescence nanoprobe with cryogenic  
378 capabilities. *J Synchrotron Radiat* 21(1):66-75.
- 379 Cvetkovic A, Menon AL, Thorgersen MP, Scott JW, Poole II FL, Jenney Jr FE, Lancaster WA,  
380 Praissman JL, Shanmukh S, Vaccaro BJ, Trauger SA, Kalisiak E, Apon JV, Siuzdak G,  
381 Yannone SM, Tainer JA, Adams MWW. 2010. Microbial metalloproteomes are largely  
382 uncharacterized. *Nature* 466:779-782.
- 383 Daims H, Stoecker K, Wagner M. 2005. Fluorescence in situ hybridization for the detection of  
384 prokaryotes. In: Osborn AM, Smith CJ, editors. *Molecular Microbial Ecology*. Abingdon,  
385 UK: Bios-Garland. p. 239.

- 386 Dawson K, Osburn M, Sessions A, Orphan V. 2015. Metabolic associations with archaea drive  
387 shifts in hydrogen isotope fractionation in sulfate-reducing bacterial lipids in cocultures  
388 and methane seeps. *Geobiology* 13(5):462-477.
- 389 Dawson KS, Strapoč D, Huizinga B, Lidstrom U, Ashby M, Macalady JL. 2012. Quantitative  
390 fluorescence in situ hybridization analysis of microbial consortia from a biogenic gas  
391 field in Alaska's Cook Inlet Basin. *Appl Environ Microbiol* 78(10):3599-3605.
- 392 Demirel B, Scherer P. 2011. Trace element requirements of agricultural biogas digesters during  
393 biological conversion of renewable biomass to methane. *Biomass Bioenerg.* 35:992-998.
- 394 Diekert G, Konheiser U, Piechulla K, Thauer RK. 1981. Nickel requirement and factor F430  
395 content of methanogenic bacteria. *J. Bacteriol.* 148(2):459-464.
- 396 Drzyzga O, El Mamouni R, Agathos SN, Gottschal JC. 2002. Dehalogenation of chlorinated  
397 ethenes and immobilization of nickel in anaerobic sediment columns under sulfidogenic  
398 conditions. *Envir Sci Tech* 36(12):2630-2635.
- 399 Ekstrom EB, Morel FMM. 2008. Cobalt limitation of growth and mercury methylation in sulfate-  
400 reducing bacteria. *Environ Sci Tech* 42(1):93-99.
- 401 Ermler U, Grabarse W, Shima S, Goubeaud M, Thauer RK. 1997. Crystal structure of methyl-  
402 coenzyme M reductase: the key enzyme of biological methane formation. *Science*  
403 278(5342):1457-1462.
- 404 Fahrni CJ. 2007. Biological applications of X-ray fluorescence microscopy: exploring the  
405 subcellular topography and speciation of transition metals. *Curr Opin Chem Biol*  
406 11(2):121-127.
- 407 Fauque GD, Barton LL. 2012. Hemoproteins in dissimilatory sulfate- and sulfur-reducing  
408 prokaryotes. *Adv Microbiol Physiol* 60:1-90.
- 409 Ferry JG. 2010. How to make a living by exhaling methane. *Ann Rev Microbiol* 64:453-473.
- 410 Finke N, Hoehler TM, Jørgensen BB. 2007. Hydrogen 'leakage' during methanogenesis from  
411 methanol and methylamine: implications for anaerobic carbon degradation pathways in  
412 aquatic sediments. *Environ Microbiol* 9(4):1060-1071.
- 413 Florencio L, Field JA, Lettinga G. 1994. Importance of cobalt for individual trophic groups in an  
414 anaerobic methanol-degrading consortium. *Appl Environ Microbiol* 60(1):227-234.
- 415 Gavel OY, Bursakov SA, Calvete JJ, George GN, Moura JJG, Moura I. 1998. ATP sulfurylases  
416 from sulfate-reducing bacteria of the genus *Desulfovibrio*. A novel metalloprotein  
417 containing cobalt and zinc. *Biochem* 37:16225-16232.
- 418 Gavel OY, Bursakov SA, Rocco GD, Trincao J, Pickering IJ, George GN, Calvete JJ, Shnyrov  
419 VL, Brondino CD, Pereira AS. 2008. A new type of metal-binding site in cobalt-and  
420 zinc-containing adenylate kinases isolated from sulfate-reducers *Desulfovibrio gigas* and  
421 *Desulfovibrio desulfuricans* ATCC 27774. *J Inorganic Biochem* 102(5):1380-1395.
- 422 Glass JB, Orphan VJ. 2012. Trace metal requirements for microbial enzymes involved in the  
423 production and consumption of methane and nitrous oxide. *Front Microbiol* 3:61.
- 424 Glass JB, Yu H, Steele JA, Dawson KS, Sun S, Chourey K, Pan C, Hettich RL, Orphan VJ.  
425 2014. Geochemical, metagenomic and metaproteomic insights into trace metal utilization  
426 by methane-oxidizing microbial consortia in sulphidic marine sediments. *Environ*  
427 *Microbiol* 16(6):1592-1611.
- 428 Gonzalez-Gil G, Kleerebezem R, Lettinga G. 1999. Effects of nickel and cobalt on kinetics of  
429 methanol conversion by methanogenic sludge as assessed by on-line CH<sub>4</sub> monitoring.  
430 *Appl Environ Microbiol* 65(4):1789-1793.

- 431 Gramp JP, Bigham JM, Sasaki K, Tuovinen OH. 2007. Formation of Ni-and Zn-sulfides in  
432 cultures of sulfate-reducing bacteria. *Geomicrobiol J* 24(7-8):609-614.
- 433 Gramp JP, Sasaki K, Bigham JM, Karnachuk OV, Tuovinen OH. 2006. Formation of covellite  
434 (CuS) under biological sulfate-reducing conditions. *Geomicrobiol J* 23(8):613-619.
- 435 Guss AM, Kulkarni G, Metcalf WW. 2009. Differences in hydrogenase gene expression between  
436 *Methanosarcina acetivorans* and *Methanosarcina barkeri*. *J Bacteriol* 191(8):2826-2833.
- 437 Hagemeyer CH, Kruer M, Thauer RK, Warkentin E, Ermler U. 2006. Insight into the mechanism  
438 of biological methanol activation based on the crystal structure of the methanol-  
439 cobalamin methyltransferase complex. *Proc Natl Acad Sci* 103(50):18917–18922.
- 440 Hamann N, Mander GJ, Shokes JE, Scott RA, Bennati M, Hedderich R. 2007. A cysteine-rich  
441 CCG domain contains a novel [4Fe-4S] cluster binding motif as deduced from studies  
442 with subunit B of heterodisulfide reductase from *Methanothermobacter marburgensis*.  
443 *Biochemistry* 46(44):12875-12885.
- 444 Hausrath EM, Liermann LJ, House CH, Ferry JG, Brantley SL. 2007. The effect of methanogen  
445 growth on mineral substrates: will Ni markers of methanogen based communities be  
446 detectable in the rock record? *Geobiology* 5(1):49-61.
- 447 Ingall ED, Diaz JM, Longo AF, Oakes M, Finney L, Vogt S, Lai B, Yager PL, Twining BS,  
448 Brandes JA. 2013. Role of biogenic silica in the removal of iron from the Antarctic seas.  
449 *Nature Comm* 4:1981.
- 450 Jansen S, Gonzalez-Gil G, van Leeuwen HP. 2007. The impact of Co and Ni speciation on  
451 methanogenesis in sulfidic media—Biouptake versus metal dissolution. *Enzyme Microb*  
452 *Tech* 40:823-830.
- 453 Jansen S, Steffen F, Threels WF, Van Leeuwen HP. 2005. Speciation of Co (II) and Ni (II) in  
454 anaerobic bioreactors measured by competitive ligand exchange-adsorptive stripping  
455 voltammetry. *Environ Sci Tech* 39(24):9493-9499.
- 456 Karnachuk OV, Sasaki K, Gerasimchuk AL, Sukhanova O, Ivashenko DA, Kaksonen AH,  
457 Puhakka JA, Tuovinen OH. 2008. Precipitation of Cu-sulfides by copper-tolerant  
458 *Desulfovibrio* isolates. *Geomicrobiol J* 25(5):219-227.
- 459 Kemner KM, Kelly SD, Lai B, Maser J, O'loughlin EJ, Sholto-Douglas D, Cai Z, Schneegurt  
460 MA, Kulpa CF, Nealson KH. 2004. Elemental and redox analysis of single bacterial cells  
461 by X-ray microbeam analysis. *Science* 306(5696):686-687.
- 462 Krumholz LR, Elias DA, Suflita JM. 2003. Immobilization of cobalt by sulfate-reducing bacteria  
463 in subsurface sediments. *Geomicrobiol J* 20(1):61-72.
- 464 Loy A, Lehner A, Lee N, Adamczyk J, Meier H, Ernst J, Schleifer K-H, Wagner M. 2002.  
465 Oligonucleotide microarray for 16S rRNA gene-based detection of all recognized  
466 lineages of sulfate-reducing prokaryotes in the environment. *Appl Environ Microbiol*  
467 68(10):5064-5081.
- 468 Luther III GW, Rickard DT. 2005. Metal sulfide cluster complexes and their biogeochemical  
469 importance in the environment. *J Nanopart Res* 7(4-5):389-407.
- 470 Macalady JL, Lyon EH, Koffman B, Albertson LK, Meyer K, Galdenzi S, Mariani S. 2006.  
471 Dominant microbial populations in limestone-corroding stream biofilms, Frasassi cave  
472 system, Italy. *Appl Environ Microbiol* 72(8):5596-5609.
- 473 Mayr S, Latkoczy C, Kruger M, Gunther D, Shima S, Thauer RK, Widdel F, Jaun B. 2008.  
474 Structure of an F430 variant from archaea associated with anaerobic oxidation of  
475 methane. *J Am Chem Soc* 130(32):10758-10767.

- 476 McGlynn SE, Chadwick GL, Kempes CP, Orphan VJ. 2015. Single cell activity reveals direct  
477 electron transfer in methanotrophic consortia. *Nature* 526:531–535.
- 478 Moreau JW, Fournelle JH, Banfield JF. 2013. Quantifying heavy metals sequestration by sulfate-  
479 reducing bacteria in an acid mine drainage-contaminated natural wetland. *Front*  
480 *Microbiol* 4:43.
- 481 Moreau JW, Webb RI, Banfield JF. 2004. Ultrastructure, aggregation-state, and crystal growth of  
482 biogenic nanocrystalline sphalerite and wurtzite. *Am Mineral* 89(7):950-960.
- 483 Moreau JW, Weber PK, Martin MC, Gilbert B, Hutcheon ID, Banfield JF. 2007. Extracellular  
484 proteins limit the dispersal of biogenic nanoparticles. *Science* 316(5831):1600-1603.
- 485 Nuester J, Vogt S, Newville M, Kustka AB, Twining BS. 2012. The unique biochemical  
486 signature of the marine diazotroph *Trichodesmium*. *Front Microbiol* 3:1-15.
- 487 Oremland RS, Polcin S. 1982. Methanogenesis and sulfate reduction: competitive and  
488 noncompetitive substrates in estuarine sediments. *Appl Environ Microbiol* 44(6):1270-  
489 1276.
- 490 Osburn MR, Dawson KS, Fogel ML, Sessions AL. 2016. Fractionation of hydrogen isotopes by  
491 sulfate-and nitrate-reducing bacteria. *Front Microbiol* 7.
- 492 Outten CE, O'Halloran TV. 2001. Femtomolar sensitivity of metalloregulatory proteins  
493 controlling zinc homeostasis. *Science* 292(5526):2488-2492.
- 494 Ozuolmez D, Na H, Lever MA, Kjeldsen KU, Jørgensen BB, Plugge CM. 2015. Methanogenic  
495 archaea and sulfate reducing bacteria co-cultured on acetate: teamwork or coexistence?  
496 *Front Microbiol* 6:492.
- 497 Paulo LM, Stams AJ, Sousa DZ. 2015. Methanogens, sulphate and heavy metals: a complex  
498 system. *Rev Environ Sci Biotech* 14(4):537-553.
- 499 Paulo PL, Jiang B, Cysneiros D, Stams AJM, Lettinga G. 2004. Effect of cobalt on the anaerobic  
500 thermophilic conversion of methanol. *Biotech Bioeng* 85(4):434-441.
- 501 Pereira IAC, Ramos AR, Grein F, Marques MC, Da Silva SM, Venceslau SS. 2011. A  
502 comparative genomic analysis of energy metabolism in sulfate reducing bacteria and  
503 archaea. *Front Microbiol* 2(69):1-22.
- 504 Phelps T, Conrad R, Zeikus J. 1985. Sulfate-dependent interspecies H<sub>2</sub> transfer between  
505 *Methanosarcina barkeri* and *Desulfovibrio vulgaris* during coculture metabolism of  
506 acetate or methanol. *Appl Environ Microbiol* 50(3):589-594.
- 507 Price NM, Harrison GI, Hering JG, Hudson RJ, Nirel PM, Palenik B, Morel FM. 1988.  
508 Preparation and chemistry of the artificial algal culture medium Aquil. *Biol Oceanogr*  
509 6(5-6):443-461.
- 510 Ragsdale SW, Kumar M. 1996. Nickel-containing carbon monoxide dehydrogenase/acetyl-CoA  
511 synthase. *Chem Rev* 96(7):2515-2540.
- 512 Raskin L, Poulsen LK, Noguera DR, Rittmann BE, Stahl DA. 1994. Quantification of  
513 methanogenic groups in anaerobic biological reactors by oligonucleotide probe  
514 hybridization. *Appl Environ Microbiol* 60(4):1241-1248.
- 515 Rouf M. 1964. Spectrochemical analysis of inorganic elements in bacteria. *J Bacteriol*  
516 88(6):1545-1549.
- 517 Scherer P, Lippert H, Wolff G. 1983. Composition of the major elements and trace elements of  
518 10 methanogenic bacteria determined by inductively coupled plasma emission  
519 spectrometry. *Biol Trace Elem Res* 5(3):149-163.
- 520 Scherer P, Sahn H. 1981. Effect of trace elements and vitamins on the growth of  
521 *Methanosarcina barkeri*. *Acta Biotechnol* 1(1):57-65.

- 522 Schmidt H, Eickhorst T, Mußmann M. 2012. Gold-FISH: a new approach for the in situ  
523 detection of single microbial cells combining fluorescence and scanning electron  
524 microscopy. *System Appl Microbiol* 35(8):518-525.
- 525 Sitte J, Pollok K, Langenhorst F, Küsel K. 2013. Nanocrystalline nickel and cobalt sulfides  
526 formed by a heavy metal-tolerant, sulfate-reducing enrichment culture. *Geomicrobiol J*  
527 30(1):36-47.
- 528 Spanjers H, Weijma J, Abusam A. 2002. Modelling the competition between sulphate reducers  
529 and methanogens in a thermophilic methanol-fed bioreactor. *Water Sci Tech* 45(10):93-  
530 98.
- 531 Stams AJ, Plugge CM. 2009. Electron transfer in syntrophic communities of anaerobic bacteria  
532 and archaea. *Nat Rev Microbiol* 7(8):568-577.
- 533 Thauer RK, Kaster A-K, Goenrich M, Schick M, Hiromoto T, Shima S. 2010. Hydrogenases  
534 from methanogenic archaea, nickel, a novel cofactor, and H<sub>2</sub> storage. *Ann Rev Biochem*  
535 79:507-536.
- 536 Thauer RK, Kaster A-K, Seedorf H, Buckel W, Hedderich R. 2008. Methanogenic archaea:  
537 ecologically relevant differences in energy conservation. *Nat Rev Microbiol* 6:579-591.
- 538 Twining BS, Baines SB, Fisher NS, Maser J, Vogt S, Jacobsen C, Tovar-Sanchez A, Sanudo-  
539 Wilhelmy SA. 2003. Quantifying trace elements in individual aquatic protist cells with a  
540 synchrotron X-ray fluorescence microprobe. *Anal Chem* 75(15):3806-3816.
- 541 Twining BS, Baines SB, Vogt S, de Jonge MD. 2008. Exploring ocean biogeochemistry by  
542 single-cell microprobe analysis of protist elemental composition. *J Eukaryot Microbiol*  
543 55(3):151-162.
- 544 van Hullebusch ED, Gieteling J, Zhang M, Zandvoort MH, Daele WV, Defrancq J, Lens PNL.  
545 2006. Cobalt sorption onto anaerobic granular sludge: Isotherm and spatial localization  
546 analysis. *J Biotechnol* 121(2):227-240.
- 547 van Hullebusch ED, Peerbolte A, Zandvoort MH, Lens PNL. 2005. Sorption of cobalt and nickel  
548 on anaerobic granular sludges: isotherms and sequential extraction. *Chemosphere*  
549 58(4):493-505.
- 550 van Hullebusch ED, Zandvoort MH, Lens PNL. 2004. Nickel and cobalt sorption on anaerobic  
551 granular sludges: kinetic and equilibrium studies. *J Chem Tech Biotech* 79(11):1219-  
552 1227.
- 553 Vogt S. 2003. MAPS: A set of software tools for analysis and visualization of 3D X-ray  
554 fluorescence data sets. *J Phys IV* 104:635-638.
- 555 Weijma J, Stams A. 2001. Methanol conversion in high-rate anaerobic reactors. *Water Sci Tech*  
556 44(8):7-14.
- 557 Xu J, Murayama M, Roco CM, Veeramani H, Michel FM, Rimstidt JD, Winkler C, Hochella  
558 MF. 2016. Highly-defective nanocrystals of ZnS formed via dissimilatory bacterial  
559 sulfate reduction: A comparative study with their abiogenic analogues. *Geochem*  
560 *Cosmochim Acta* 180:1-14.
- 561 Zandvoort MH, Geerts R, Lettinga G, Lens PNL. 2003. Methanol degradation in granular sludge  
562 reactors at sub-optimal metal concentrations: role of iron, nickel and cobalt. *Enzyme*  
563 *Microbiol Tech* 33(2-3):190-198.
- 564 Zandvoort MH, van Hullebusch ED, Gieteling J, Lens PNL. 2006. Granular sludge in full-scale  
565 anaerobic bioreactors: trace element content and deficiencies. *Enzyme Microbiol Tech*  
566 39(2):337-346.

- 567 Zhang Y, Gladyshev VN. 2010. dbTEU: a protein database of trace element utilization.  
568 Bioinformatics 26(5):700-702.  
569 Zhang Y, Rodionov DA, Gelfand MS, Gladyshev VN. 2009. Comparative genomic analyses of  
570 nickel, cobalt and vitamin B12 utilization. BMC Genomics 10(78):1-26.

571



## ICP-MS

## SXRF

100%  
*Methanosarcina*  
*acetivorans*

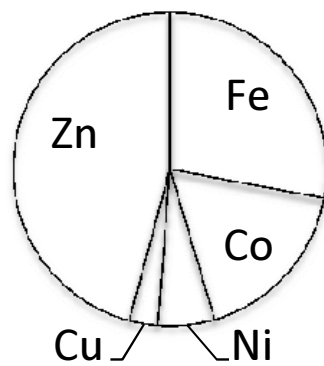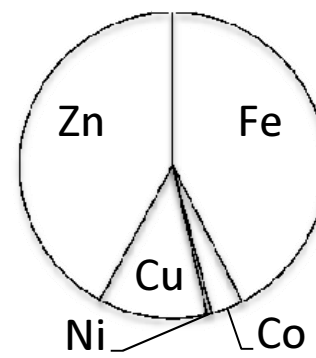

100%  
*Desulfococcus*  
*multivorans*

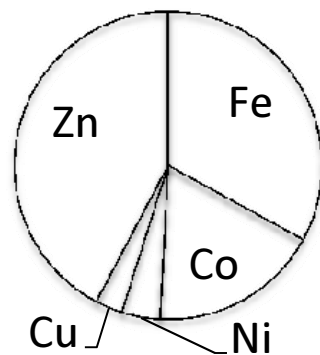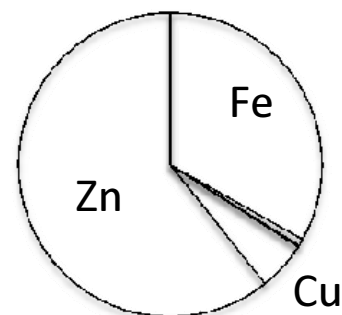

77% *Methanosarcina*  
*acetivorans*,  
23% *Desulfococcus*  
*multivorans*

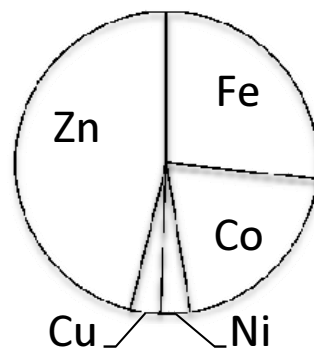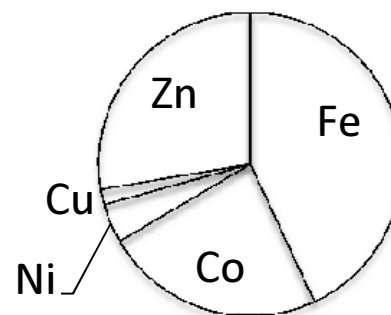

10  $\mu\text{m}$

Figure 2

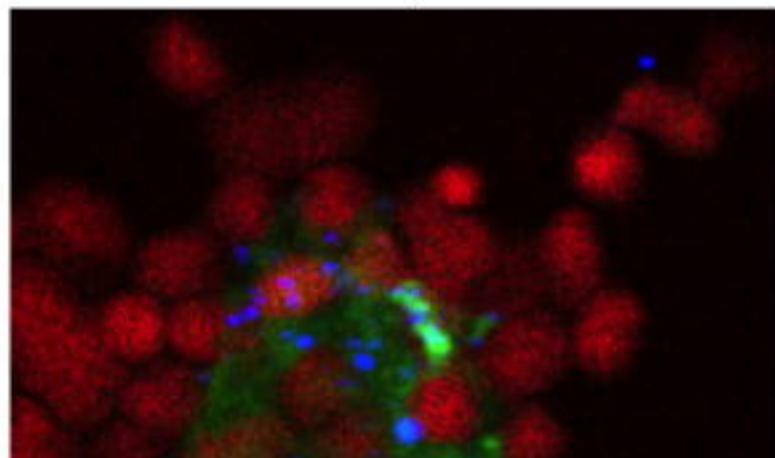

P (3.5) Co (0.4) Zn (0.7)

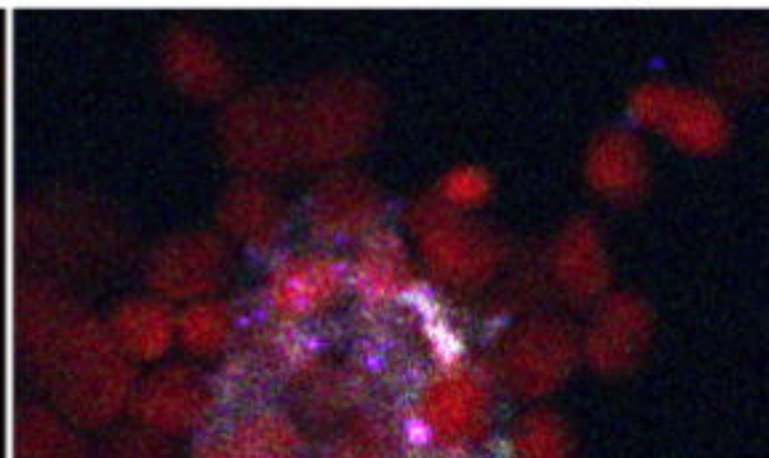

S (2.7) Ni (0.03) Cu (0.04)

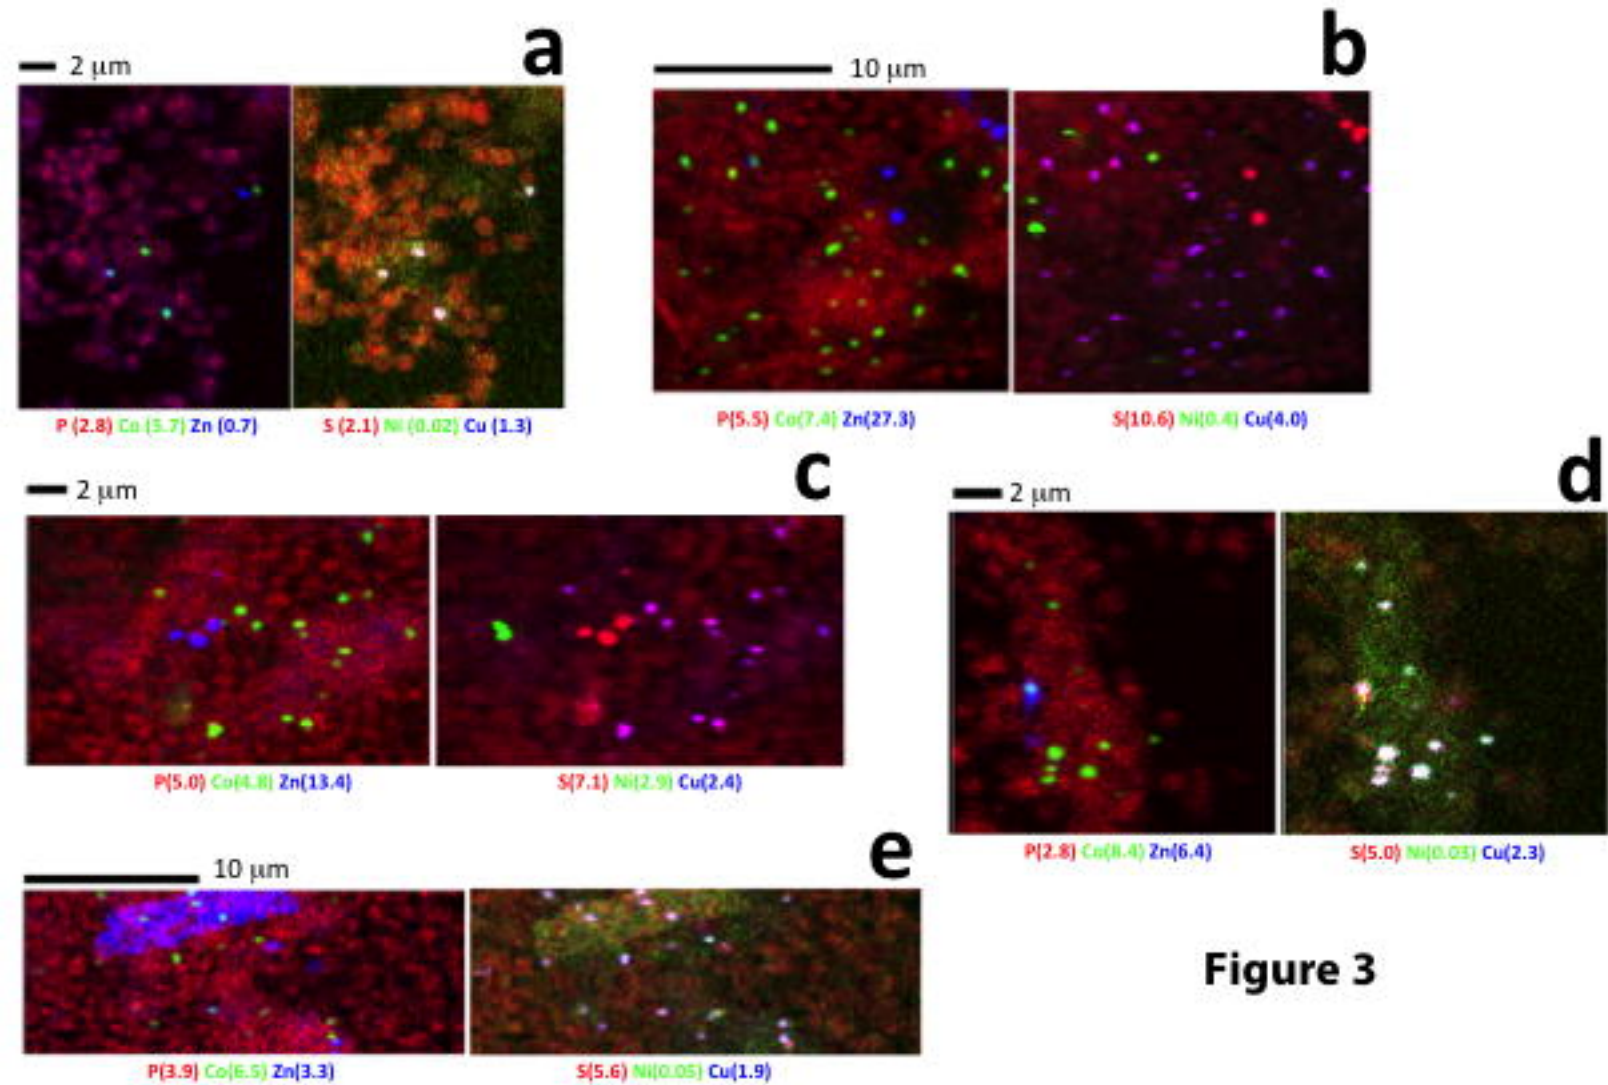

# *Desulfococcus multivorans*

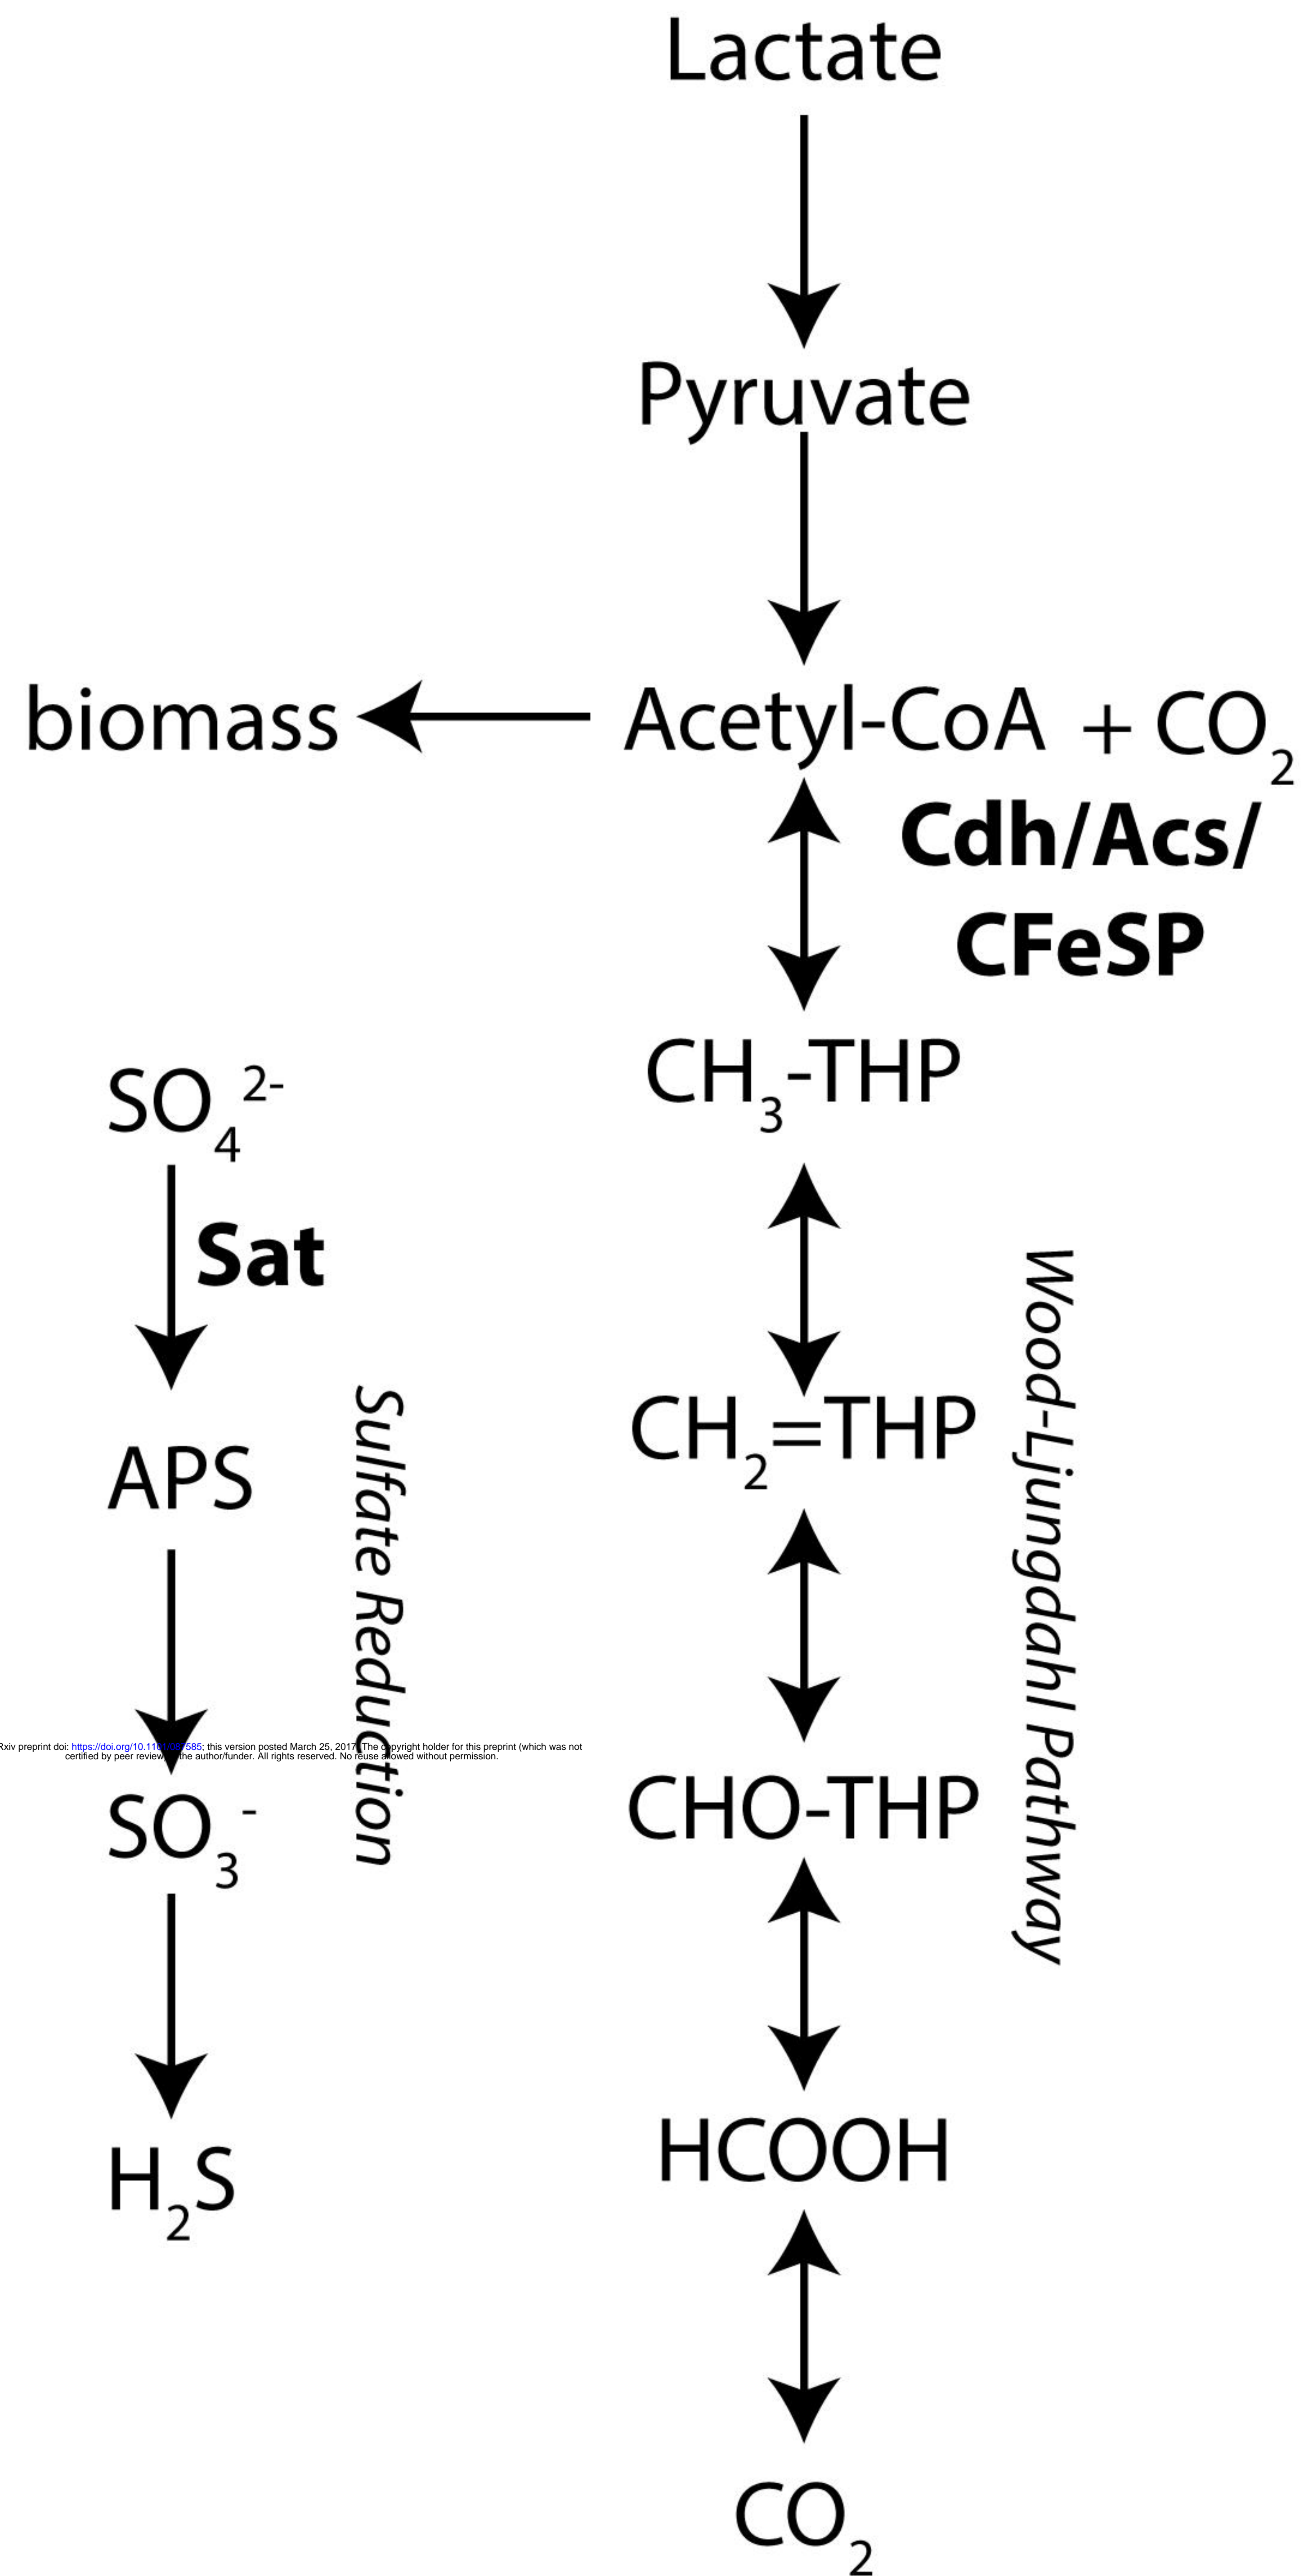

# *Methanosarcina acetivorans* C2A

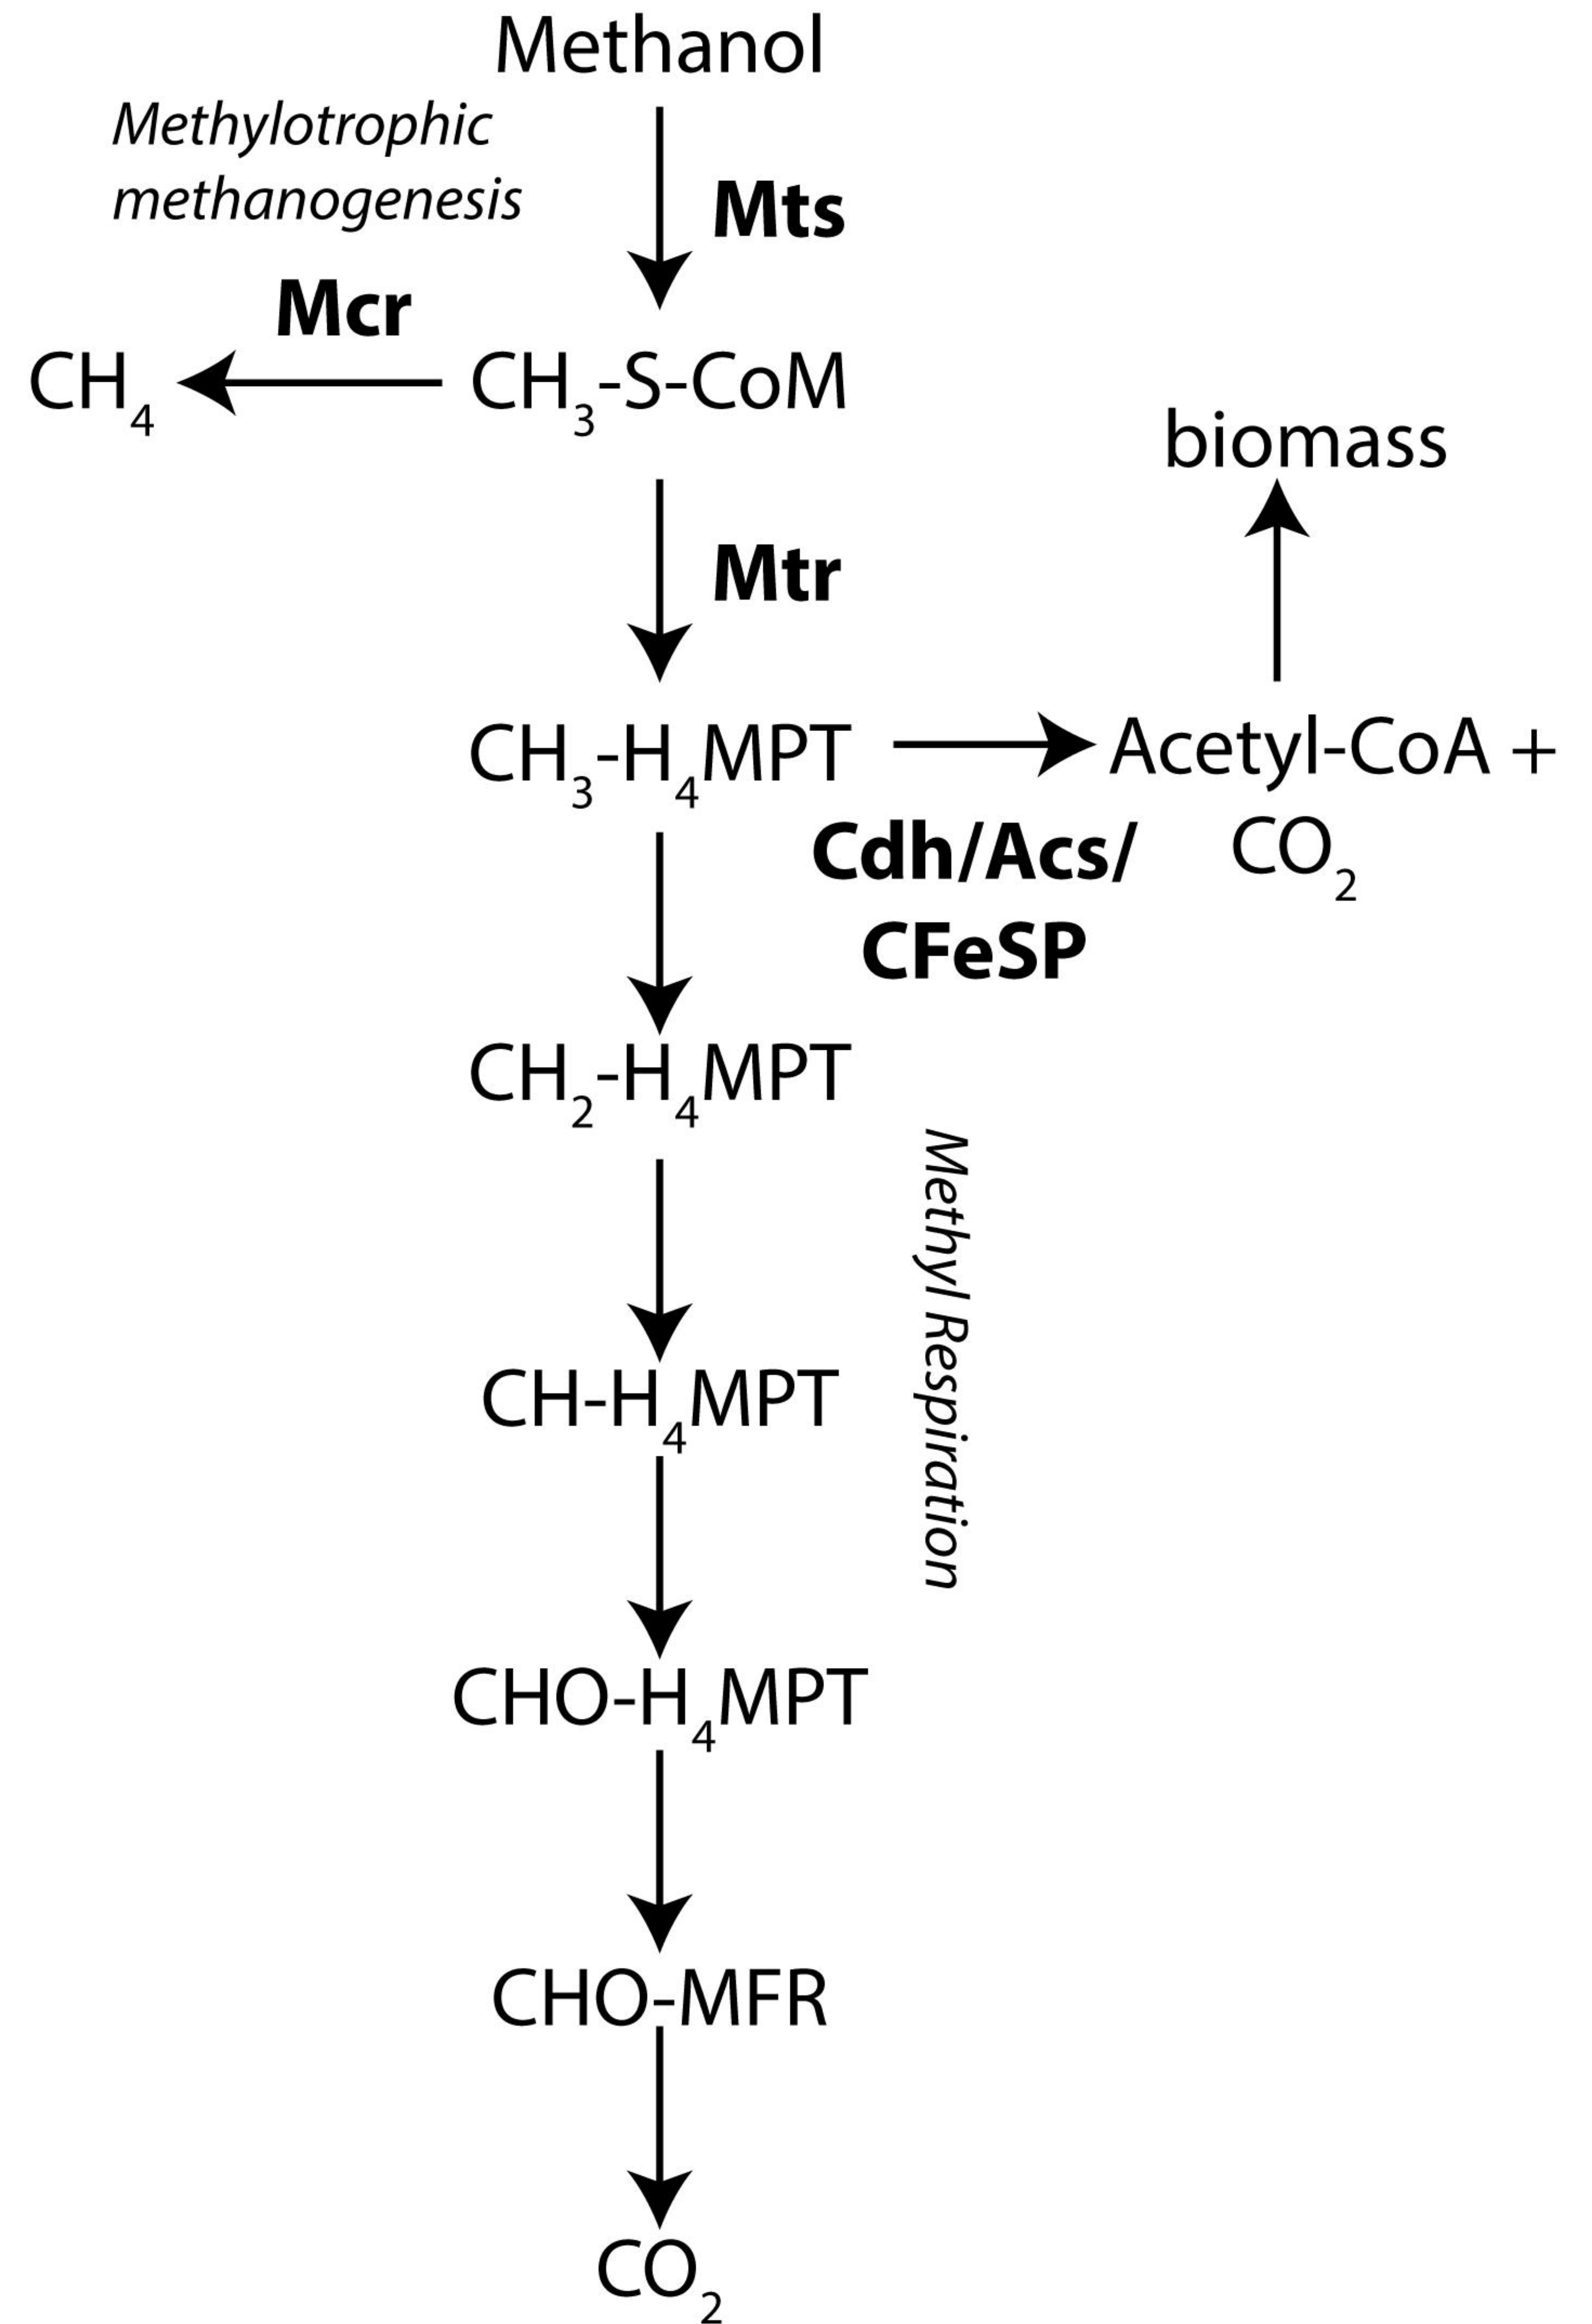

Source: http://www.biorxiv.org/content/10.1101/087585v2.full.pdf
